# Supplementary material for: The nonverbal expression of guilt in healthy adults
Source: PubMed Central journal article supplement (PMC11078964; doi:10.1038/s41598-024-60980-0), 2024-05-08
Supplement: 41598_2024_60980_MOESM1_ESM.pdf [file 41598_2024_60980_MOESM1_ESM.pdf]

The nonverbal expression of guilt in healthy adults

Chloe A Stewart, Derek GV Mitchell, Penny A. MacDonald, Stephen H Pasternak, Paul F

Tremblay, Elizabeth C Finger

# Table of Contents

|                                                                                                                                                                                            |           |
|--------------------------------------------------------------------------------------------------------------------------------------------------------------------------------------------|-----------|
| <b>Questions and response options for Opinions and Behaviour Questionnaire</b>                                                                                                             | <b>3</b>  |
| <b>Supplemental Table 1.</b> Video clip details .....                                                                                                                                      | <b>15</b> |
| <b>Supplemental Table 2.</b> Results of video pilot study. ....                                                                                                                            | <b>17</b> |
| <b>Supplemental Table 3.</b> Video clips.....                                                                                                                                              | <b>20</b> |
| <b>Supplemental Table 4.</b> Feedback Statements .....                                                                                                                                     | <b>21</b> |
| <b>Supplemental Table 5.</b> Means, standard deviations, and ranges for trait and state characteristics.....                                                                               | <b>22</b> |
| <b>Supplemental Table 6.</b> Total counts of primary emotions endorsed by target emotion .....                                                                                             | <b>23</b> |
| <b>Supplemental Table 7.</b> Total numbers of primary emotions endorsed and congruence with the video's target emotion, with total emotions broken down by valence and social nature ..... | <b>23</b> |
| <b>Supplemental Table 8.</b> Counts of secondary emotions endorsed by target emotion .....                                                                                                 | <b>24</b> |
| <b>Supplemental Table 9.</b> Total numbers of secondary emotions endorsed, with total emotions broken down by valence and social nature .....                                              | <b>24</b> |
| <b>Supplemental Table 10.</b> Results of paired Wilcoxon tests for AU 4-Brow Lowerer .....                                                                                                 | <b>25</b> |
| <b>Supplemental Table 11.</b> Results of paired Wilcoxon tests for AU 12-Lip corner puller.....                                                                                            | <b>25</b> |
| <b>Supplemental Table 12.</b> Results of paired Wilcoxon tests for head tilt down .....                                                                                                    | <b>25</b> |
| <b>Supplemental Table 13.</b> Results of paired Wilcoxon tests for head turn .....                                                                                                         | <b>25</b> |
| <b>Supplemental Table 14.</b> Results of paired Wilcoxon tests for face touch.....                                                                                                         | <b>26</b> |

## Questions and response options for Opinions and Behaviour Questionnaire

Do you think that it is important to help the poor or underprivileged?

1. Yes
2. No
3. Don't know

Do you think that you personally could do more to help the poor or underprivileged here in Canada?

1. Yes
2. No
3. Don't know

Do you think that other people in your age group could do more to help the poor or underprivileged in Canada?

1. Yes
2. No
3. Don't know

In the past 12 months, have you done any unpaid work for any charitable organization?

1. Yes
  - a. If yes, how many organizations? \_\_\_\_\_
  - b. How much time on average per week, in hours? \_\_\_\_\_
2. No

In the past 12 months, have you made any charitable donations of money, or raised money for a charitable organization?

1. Yes
  - a. If yes, how many organizations? \_\_\_\_\_
  - b. How much money on average per month? \_\_\_\_\_
2. No

In the past 12 months, have you made any donations of items or food to a charitable organization?

1. Yes
  - a. If yes, how many organizations? \_\_\_\_\_
  - b. How many donations have you made on average per month? \_\_\_\_\_
2. No

On a scale from 1 to 5, how often do you think about volunteering or giving money, but ultimately decide not to?

- |                |   |   |   |            |
|----------------|---|---|---|------------|
| 1              | 2 | 3 | 4 | 5          |
| Not very often |   |   |   | Very often |

On a scale from 1 to 5, how often do you give spare change to charitable causes asking for money in public places?

|       |   |   |   |        |
|-------|---|---|---|--------|
| 1     | 2 | 3 | 4 | 5      |
| Never |   |   |   | Always |

On a scale from 1 to 5, how important do you think small donations of spare change are to charities?

|                         |   |   |   |                |
|-------------------------|---|---|---|----------------|
| 1                       | 2 | 3 | 4 | 5              |
| Not important at<br>all |   |   |   | Very important |

Do you think that you personally could do more to help the poor or underprivileged abroad?

1. Yes
2. No
3. Don't know

Do you think that other people in your age group could do more to help the poor or underprivileged abroad?

1. Yes
2. No
3. Don't know

On a scale from 1 to 5, how important is it to you to support individuals in other countries who are poor or underprivileged?

|                         |   |   |   |                |
|-------------------------|---|---|---|----------------|
| 1                       | 2 | 3 | 4 | 5              |
| Not important at<br>all |   |   |   | Very important |

Do you find constant requests for money or time from charitable organizations to be exhausting or irritating?

1. Yes
2. Sometimes
3. No

On a scale from 1 to 5, how exhausting or irritating do you find charity appeals?

|                                        |   |   |   |                                   |
|----------------------------------------|---|---|---|-----------------------------------|
| 1                                      | 2 | 3 | 4 | 5                                 |
| Not exhausting<br>or irritating at all |   |   |   | Very exhausting<br>and irritating |

On a scale from 1 to 5, how often do you change the channel or ignore a commercial when it becomes clear that it is a charity appeal?

|       |   |   |   |        |
|-------|---|---|---|--------|
| 1     | 2 | 3 | 4 | 5      |
| Never |   |   |   | Always |

On a scale from 1 to 5, how often do you wish that you did not have to see charity appeals, whether they are TV commercials, print ads, or some other appeal?

|   |   |   |   |   |
|---|---|---|---|---|
| 1 | 2 | 3 | 4 | 5 |
|---|---|---|---|---|

Never

Always

On a scale from 1 to 5, how important is it to you to protect or defend individuals fleeing war or unrest in their home countries?

1                      2                      3                      4                      5  
Not important at                      Very important  
all

On a scale from 1 to 5, how supportive are you of Canada's current efforts to resettle refugees in Canada?

1                      2                      3                      4                      5  
Not at all                      Very supportive  
supportive

In the past 12 months have you been involved, through donations of money, time, or goods, in efforts to resettle refugees in Canada?

1. Yes
2. No

### **Environment and Conservation**

In the past 12 months have you engaged in formal or informal unpaid activities aimed at conservation or preservation of the environment or wildlife?

1. Yes
  - a. How much time on average per week, in hours? \_\_\_\_\_
2. No
3. Don't know

In the past 12 months did you personally contribute to, or were you an unpaid member of, a group or club whose primary focus was environmental protection or preservation?

1. Yes
  - a. If yes, how many organizations? \_\_\_\_\_
2. No
3. Don't know

Which statement best describes your attitude towards recycling?

1. I recycle all recyclable materials regularly at home and in public, regardless of inconvenience
2. I recycle most recyclable materials regularly at home and in public, if there is a receptacle nearby
3. I occasionally recycle recyclable materials at home and in public
4. I rarely recycle recyclable materials at home or in public
5. I never recycle recyclable materials at home or in public

Do you have a washing machine in your house?

1. Yes
2. No

How frequently do you (or the person responsible in your home) do laundry, per month?

1. 1-2 times
2. 2-4 times
3. 4 times or more

What temperature of water do you usually use to wash your laundry?

1. Hot
2. Warm
3. Cold
4. Don't know

Do you usually use a dryer, or do you air dry clothing where possible?

1. Usually use a dryer in both summer and winter
2. Usually use a dryer in winter, but not in summer
3. Do not have/do not use a dryer

How often do you use the stove or oven to prepare meals?

1. Less than once a week
2. For about  $\frac{1}{4}$  of all meals
3. For about half of all meals
4. For about  $\frac{3}{4}$  of all meals
5. For all or almost all meals

On average, how often do you bake desserts (cakes, cookies, etc.)?

1. Less than once a week
2. 1-2 times a week
3. 3-4 times a week
4. 5-6 times a week
5. 6-7 times a week
6. More than 6-7 times a week

On average, how often do you bake non-desserts (breads, muffins, etc.)?

1. Less than once a week
2. 1-2 times a week
3. 3-4 times a week
4. 5-6 times a week
5. 6-7 times a week
6. More than 6-7 times a week

How frequently do you vacuum your whole home?

1. Less than once a week
2. 1-2 times a week
3. 3-4 times a week
4. 5-6 times a week
5. 6-7 times a week
6. More than 6-7 times a week

How many personal computers do you use regularly? \_\_\_\_\_

On average, how many hours do you have your main personal computer turned on per week? \_\_\_\_\_

On average, how many hours do you use your main personal computer per week? \_\_\_\_\_

On the average day, for how many hours are the lights in your house left on? \_\_\_\_\_

On a scale from 1 to 5, how important is preserving the environment to you?

1 2 3 4 5  
Not important at all Very important

In the past 12 months, what percentage of your purchases were of environmentally friendly or “green” products?

1. Less than 10%
2. 10-20%
3. 20-30%
4. 30-40%
5. 40%-50%
6. 50% or more

On a scale from 1 to 5, how important is sustainable farming/food production to you?

1 2 3 4 5  
Not important at all Very important

### **Health and Safety**

Are you able to drive?

1. Yes
2. No

Do you currently own or regularly operate a car?

1. Yes
2. No

In the past 12 months, have you sped while driving, passed without adequate space, or otherwise driven unsafely?

1. Yes, frequently
2. Yes, on a few occasions
3. Yes, rarely
4. No

In the past twelve months have you donated blood to the Canadian Blood Services?

1. Yes
2. No
3. I am unable to do so due to a medical disorder or legislated restrictions.

Are you currently registered as an organ donor, or would you be willing to register to donate tissue or organs?

1. Yes
2. No
3. I am unable to do so due to a medical disorder or legislated restrictions.

On a scale from 1 to 5, how important is blood and organ donation to you?

|                         |   |   |   |                |
|-------------------------|---|---|---|----------------|
| 1                       | 2 | 3 | 4 | 5              |
| Not important at<br>all |   |   |   | Very important |

On a scale from 1 to 5, how easily do you get sad when watching a sad movie or thinking about something sad?

|                   |   |   |   |             |
|-------------------|---|---|---|-------------|
| 1                 | 2 | 3 | 4 | 5           |
| Not easily at all |   |   |   | Very easily |

In the past 12 months have you experienced bereavement due to the death of a close loved one?

1. Yes
2. No

In the past 12 months have you experienced bereavement due to the death of a pet?

1. Yes
2. No

Have you or someone close to you ever been diagnosed with cancer?

1. Yes
2. No

On a scale from 1 to 5, how important is finding a cure for cancer to you?

|                         |   |   |   |                |
|-------------------------|---|---|---|----------------|
| 1                       | 2 | 3 | 4 | 5              |
| Not important at<br>all |   |   |   | Very important |

Do you donate time or money to charities or groups dedicated to curing cancer?

1. Yes
  - a. If yes, how many organizations? \_\_\_\_\_
  - b. If you donate time, how much time on average per week, in hours? \_\_\_\_\_
  - c. If you donate money, how much money on average per month? \_\_\_\_\_
2. No

On a scale from 1 to 5, how often does seeing people crying make you feel sad?

|       |   |   |   |        |
|-------|---|---|---|--------|
| 1     | 2 | 3 | 4 | 5      |
| Never |   |   |   | Always |



Have you or someone close to you been diagnosed with a dementia such as Alzheimer's disease?

1. Yes
2. No

On a scale from 1 to 5, how often do you cry, or feel like crying, while watching a sad movie or thinking about something sad?

|              |   |   |   |               |
|--------------|---|---|---|---------------|
| 1            | 2 | 3 | 4 | 5             |
| Almost never |   |   |   | Almost always |

On a scale from 1 to 5, how strongly do you feel sorry for people whose parent(s) has recently died?

|                   |   |   |   |               |
|-------------------|---|---|---|---------------|
| 1                 | 2 | 3 | 4 | 5             |
| Not very strongly |   |   |   | Very strongly |

On a scale from 1 to 5, how strongly do you feel sorry for people whose child(ren) has recently died?

|                   |   |   |   |               |
|-------------------|---|---|---|---------------|
| 1                 | 2 | 3 | 4 | 5             |
| Not very strongly |   |   |   | Very strongly |

On a scale from 1 to 5, how strongly do you feel sorry for people who have recently lost a pet?

|                   |   |   |   |               |
|-------------------|---|---|---|---------------|
| 1                 | 2 | 3 | 4 | 5             |
| Not very strongly |   |   |   | Very strongly |

On a scale from 1 to 5, how likely are you to feel sick to your stomach if you see someone vomiting?

|       |   |   |   |        |
|-------|---|---|---|--------|
| 1     | 2 | 3 | 4 | 5      |
| Never |   |   |   | Always |

On a scale from 1 to 5, how much does it bother you to see food that has been contaminated in some way, such as food that is rotting or food that has bugs in it?

|                             |   |   |   |                            |
|-----------------------------|---|---|---|----------------------------|
| 1                           | 2 | 3 | 4 | 5                          |
| It doesn't bother me at all |   |   |   | It bothers me a great deal |

Would you rather throw food out than risk eating something that has spoiled?

1. Yes
2. No

On average per month, what percentage of the food you purchase do you throw away because it has gone bad or you fear it has gone bad?

1. Less than 10%
2. 10-20%
3. 20-30%
4. 30-40%
5. 40%-50%
6. 50% or more



- ii. No
- iii. Not sure yet

Would you ever consider adopting a child from foster care?

1. Yes, I currently have one or more adopted children
2. Yes, I would like to one day adopt a child
3. Yes, I would consider it in the future, when I am older or more stable
4. No, I have considered it and do not think it is right for me
5. No, I have never considered it and would not be willing to adopt a child

On a scale from 1 to 5, how important do you think adoption and foster care are for society?

|                         |   |   |   |                |
|-------------------------|---|---|---|----------------|
| 1                       | 2 | 3 | 4 | 5              |
| Not important at<br>all |   |   |   | Very important |

### **Advertisement and Consumption**

Do you find that you laugh more easily than most people you know?

1. I laugh less easily
2. I laugh about as easily
3. I laugh more easily

On a scale from 1 to 5, how often do you laugh when you are with friends?

|             |   |   |   |            |
|-------------|---|---|---|------------|
| 1           | 2 | 3 | 4 | 5          |
| Very rarely |   |   |   | Very often |

On a scale from 1 to 5, how much do you enjoy laughing?

|            |   |   |   |           |
|------------|---|---|---|-----------|
| 1          | 2 | 3 | 4 | 5         |
| Not at all |   |   |   | Very much |

On a scale from 1 to 5, how influential is a celebrity endorsement on your decision to buy a product?

|                           |   |   |   |                  |
|---------------------------|---|---|---|------------------|
| 1                         | 2 | 3 | 4 | 5                |
| Not influential at<br>all |   |   |   | Very influential |

Have you ever purchased something because your favourite celebrity endorsed it?

1. Yes
  - a. Did you subsequently regret that purchase?
    - i. Yes
    - ii. No
2. No

How many languages do you speak?

1. 1-2
2. 2-4
3. 4 or more

Have you ever considered learning another language?

1. Yes
  - a. Are you currently learning another language?
    - i. Yes
    - ii. No
2. No

On a scale from 1 to 5, how much influence do you think advertisements have on your buying behaviour?

|                        |   |   |   |                  |
|------------------------|---|---|---|------------------|
| 1                      | 2 | 3 | 4 | 5                |
| Not influential at all |   |   |   | Very influential |

Have you ever purchased something just because you liked the ads?

1. Yes
  - a. Did you subsequently regret that purchase?
    - i. Yes
    - ii. No
2. No

On a scale from 1 to 5, how important is humour in advertising to you?

|                      |   |   |   |                |
|----------------------|---|---|---|----------------|
| 1                    | 2 | 3 | 4 | 5              |
| Not important at all |   |   |   | Very important |

On a scale from 1 to 5, how memorable do you find funny ads?

|                      |   |   |   |                |
|----------------------|---|---|---|----------------|
| 1                    | 2 | 3 | 4 | 5              |
| Not memorable at all |   |   |   | Very memorable |

Have you ever chosen one product over another just because their ad was funnier?

1. Yes
2. No

On a scale from 1 to 5, how important is it to you to have the newest and latest technology?

|                      |   |   |   |                |
|----------------------|---|---|---|----------------|
| 1                    | 2 | 3 | 4 | 5              |
| Not important at all |   |   |   | Very important |

Do you enjoy receiving or purchasing new things?

1. Yes
2. No

Do you think that having new things is important?

1. Yes
2. No

## National Identity

Where were you born?

1. In Canada
2. Outside Canada

What is your current citizenship status?

1. Canadian by birth
2. Landed immigrant
3. Refugee
4. Currently seeking to become a Canadian citizen
5. Not currently seeking to become a Canadian citizen

On a scale from 1 to 5, how proud are you of being Canadian?

1 2 3 4 5  
Not proud at all Very proud

On a scale from 1 to 5, how important is your Canadian identity to you?

1 2 3 4 5  
Not important at all Very important

On a scale from 1 to 5, how important is it to you to carry on Canadian traditions, customs, and holidays?

1 2 3 4 5  
Not important at all Very important

On a scale from 1 to 5, how important is it to you to know about Canadian history?

1 2 3 4 5  
Not important at all Very important

Do you support the Canadian government's efforts to celebrate Canadian history?

1. Yes
2. No

On a scale from 1 to 5, how strong is your sense of belonging to Canada?

1 2 3 4 5  
Very weak Very strong

On a scale from 1 to 5, how strong is your sense of belonging to the world?

1 2 3 4 5  
Very weak Very strong

Do you feel connected to humanity?

1. Yes
2. No

On a scale from 1 to 5, how important is it to you to be a good Canadian?

1 2 3 4 5  
Not important at all Very important

Do you typically think of yourself and your fellow Canadians as generally good, kind, and polite?

1. Yes
2. No
3. Don't know

On a scale from 1 to 5, how much do you enjoy watching the Olympics?

1 2 3 4 5  
Not at all Very much

On a scale from 1 to 5, how proud of being a Canadian do you feel when Canada does well in the Olympics?

1 2 3 4 5  
Not proud at all Very proud

On a scale from 1 to 5, how proud do you feel of humanity when you see other people succeeding?

1 2 3 4 5  
Not proud at all Very proud

Are you, or is at least one immediate family member, a current or veteran member of the Canadian Armed Forces?

1. Yes, I am in the armed forces, or a veteran
2. Yes, an immediate family member is in the armed forces or a veteran
3. Yes, both I and an immediate family member are in the armed forces or a veteran
4. No, neither I nor an immediate family member are in the armed forces or a veteran

On a scale from 1 to 5, how important is Canada's dedication to peacekeeping to you?

1 2 3 4 5  
Not important at all Very important

On a scale from 1 to 5, how proud are you of the Canadian Armed Forces and their contribution to Canada's security?

1 2 3 4 5  
Not proud at all Very proud

On a scale from 1 to 5, how important is it to you to remember Canada's contributions in wartime?

1 2 3 4 5  
Not important at all Very important

**Supplemental Table 1.** Video clip details

| <b>Video Name</b>                    | <b>Target Emotion</b> | <b>Length</b> | <b>Analyzed Length*</b> | <b>Topic</b>                 | <b>Source Agency/Film</b>   | <b>Source Country</b> |
|--------------------------------------|-----------------------|---------------|-------------------------|------------------------------|-----------------------------|-----------------------|
| <b>60 Seconds Blood Donation</b>     | Guilt                 | 60s           | 45s                     | Blood Donation               | Canadian Blood Services     | Canada                |
| <b>Africare - Shoeboxes</b>          | Guilt                 | 30s           | 20s                     | Poverty/Abroad               | Africare                    | USA                   |
| <b>Black Friday</b>                  | Guilt                 | 30s           | 8s                      | Poverty/Canada               | Salvation Army              | Canada                |
| <b>WWF Laptop</b>                    | Guilt                 | 2m15s         | 1m20s                   | Environment/Climate Change   | World Wildlife Fund         | USA                   |
| <b>WWF T-Shirt</b>                   | Guilt                 | 1m50s         | 1m30s                   | Environment/Climate Change   | World Wildlife Fund         | USA                   |
| <b>Don't Almost Give-Jack</b>        | Guilt                 | 30s           | 20s                     | Poverty/Canada               | Ad Council                  | USA                   |
| <b>Let Them Figure It Out</b>        | Guilt                 | 60s           | 53s                     | Environment/Climate Change   | Government of Ontario       | Canada                |
| <b>One Child</b>                     | Guilt                 | 1m40s         | 1m20s                   | Poverty/Abroad               | Save the Children           | UK                    |
| <b>Strawberry Wasted</b>             | Guilt                 | 60s           | 15s                     | Food Waste                   | Ad Council                  | USA                   |
| <b>Without...</b>                    | Guilt                 | 1m15s         | 57s                     | Poverty/Abroad               | Save the Children           | USA                   |
| <b>Go First</b>                      | Amusement             | 30s           | 18s                     | Advertisement                | Cars.com                    | USA                   |
| <b>Dad Makes Cookies</b>             | Amusement             | 30s           | 21s                     | Adoption                     | Ad Council                  | USA                   |
| <b>Charlie Sheen</b>                 | Amusement             | 30s           | 20s                     | Advertisement                | DirecTV                     | USA                   |
| <b>French</b>                        | Amusement             | 45s           | 36s                     | Adoption                     | Ad Council                  | USA                   |
| <b>Haircut</b>                       | Amusement             | 30s           | 20s                     | Adoption                     | Ad Council                  | USA                   |
| <b>Sinking</b>                       | Amusement             | 40s           | 30s                     | Advertisement                | Berlitz                     | USA                   |
| <b>Drinking 6000 Blended Maggots</b> | Disgust               | 45s           | 40s                     | Insect consumption, vomiting | Where's My Challenge        | UK                    |
| <b>Custard</b>                       | Disgust               | 60s           | 45s                     | Food contamination           | Braindead                   | New Zealand           |
| <b>The Poop Lady</b>                 | Disgust               | 55s           | 47s                     | Food contamination           | Hoarders                    | USA                   |
| <b>Rotting Chicken</b>               | Disgust               | 1m16s         | 1m12s                   | Rotting food                 | Home video/<br>David0101010 | Unknown               |

|                                    |         |       |       |                                 |                               |           |
|------------------------------------|---------|-------|-------|---------------------------------|-------------------------------|-----------|
| <b>Rotting Meat</b>                | Disgust | 1m36s | 1m31s | Rotting food                    | Home video/<br>agnozja        | Unknown   |
| <b>Toxic Food Environment</b>      | Disgust | 20s   | 17s   | Vomiting                        | Supersize Me                  | USA       |
| <b>Cotton</b>                      | Neutral | 1m    | 30s   | Informational                   | How It's Made                 | Canada    |
| <b>Erasers</b>                     | Neutral | 45s   | 23s   | Informational                   | How It's Made                 | Canada    |
| <b>Fibre Optics</b>                | Neutral | 40s   | 20s   | Informational                   | How It's Made                 | Canada    |
| <b>Playing Cards</b>               | Neutral | 35s   | 18s   | Informational                   | How It's Made                 | Canada    |
| <b>Rubber Gloves</b>               | Neutral | 40s   | 20s   | Informational                   | How It's Made                 | Canada    |
| <b>Stickers</b>                    | Neutral | 35s   | 18s   | Informational                   | How It's Made                 | Canada    |
| <b>Fly the Flag</b>                | Pride   | 60s   | 52s   | Canadian identity               | Air Canada                    | Canada    |
| <b>Greatest Human Achievements</b> | Pride   | 1m55s | 1m30s | World unity/human excellence    | Questar Video                 | UK        |
| <b>I Am Canadian</b>               | Pride   | 1m    | 39s   | Canadian identity               | Molson Canadian               | Canada    |
| <b>Made From Canada</b>            | Pride   | 45s   | 37s   | Canadian identity               | Molson Canadian               | Canada    |
| <b>Peacekeeping</b>                | Pride   | 1m10s | 53s   | Canadian Peacekeeping           | Royal Canadian Mounted Police | Canada    |
| <b>The Anthem</b>                  | Pride   | 1m30s | 1m18s | World unity                     | Samsung Mobile                | USA       |
| <b>12 Days of Christmas</b>        | Sadness | 1m30s | 1m9s  | Anti-drunk driving              | Transport Accident Commission | Australia |
| <b>Dying Wife</b>                  | Sadness | 1m20s | 1m15s | Death of a loved one            | Home video/ Erin Solari       | USA       |
| <b>Madly in love</b>               | Sadness | 1m45s | 1m10s | Loss of a loved one to dementia | Human Kind                    | USA       |
| <b>Last Minutes with Oden</b>      | Sadness | 1m10s | 59s   | Death of a pet                  | Phos Pictures                 | USA       |
| <b>Notification</b>                | Sadness | 45s   | 25s   | Death of a loved one            | The Messenger                 | USA       |
| <b>SickKids vs Cancer</b>          | Sadness | 40s   | 19s   | Childhood cancer                | SickKids                      | Canada    |

\*Analyzed length indicates the time window of analysis which began at average onset of emotion experienced based on piloting and ended at the conclusion of the video clip. For example, for a 60s second video clip with an analyzed length of 45s, the time window analyzed began 15 seconds after the start of the clip and continued until the video ended.



**Supplemental Table 2.** Results of video pilot study. The negative-positive axis, calm-aroused axis, and dominated-dominating axis were rated from 1-9, with 1 representing very negative, calm, and dominated and 9 representing very positive, aroused, and dominating. Emotions are presented with the percentage of participants who endorsed that emotion as being their primary emotion felt. Participants were also allowed to freely generate any additional emotions they experienced.

| <b>Video</b>                              | <b>Emotion Target</b> | <b>Neg/ Pos</b> | <b>Calm/ Aroused</b> | <b>Dom/ Dom</b> | <b>Emotion Endorsed</b>                                                   | <b>Other Emotion Endorsed</b>                         |
|-------------------------------------------|-----------------------|-----------------|----------------------|-----------------|---------------------------------------------------------------------------|-------------------------------------------------------|
| <b>Sinking</b>                            | Amusement             | 7.3             | 5.4                  | 5.8             | Amusement(100)                                                            | Happiness, laughter, pride                            |
| <b>Go First</b>                           | Amusement             | 6.2             | 3.9                  | 5.1             | Amusement(85), Neutral(15)                                                | Neutral, amusement, humour                            |
| <b>Haircut</b>                            | Amusement             | 6.2             | 3.9                  | 5.4             | Amusement (67), Neutral(22), Happy(11)                                    | Humour, happy                                         |
| <b>Charlie Sheen</b>                      | Amusement             | 5.6             | 3.4                  | 5.1             | Amusement(75), Neutral(25)                                                | Humour                                                |
| <b>Dad Makes Cookies</b>                  | Amusement             | 6.4             | 3.5                  | 5.3             | Amusement (64), Neutral (22), Pride(7), Happy (7)                         | Confusion, Amusement, Excitement, Satisfaction, Pride |
| <b>French</b>                             | Amusement             | 6.4             | 3.8                  | 5.4             | Amusement (64), Neutral (29), Happy(7)                                    | Happy, pride                                          |
| <b>Drinking 6000 Blended Live Maggots</b> | Disgust               | 3.1             | 5.6                  | 3.6             | Disgust(70), Amusement(8), Sadness(8), Neutral(7), Anger(7)               | Disgust, amused                                       |
| <b>Poop Lady</b>                          | Disgust               | 2.5             | 5.8                  | 4.8             | Disgust (100)                                                             | Sadness                                               |
| <b>Toxic Food Environment</b>             | Disgust               | 3.8             | 3.3                  | 4               | Disgust (50), Neutral (38), Sadness (12)                                  | Sadness                                               |
| <b>Custard</b>                            | Disgust               | 3.2             | 5.3                  | 4.0             | Disgust(78), Amusement(22)                                                | Disgust                                               |
| <b>Rotting meat</b>                       | Disgust               | 3.9             | 4.6                  | 4.7             | Disgust (56) Neutral (33) Amuse(11)                                       | Unsettled, disgust                                    |
| <b>Rotting Chicken</b>                    | Disgust               | 3.6             | 4.4                  | 4.4             | Disgust (75), Neutral (25)                                                | Disgust                                               |
| <b>WWF T-Shirt</b>                        | Guilt                 | 4.4             | 4.3                  | 4.9             | Neutral(29), Guilt(29), Shame (14), Pride(7), Fear(7), Happy(7), Anger(7) | Guilt, compelled                                      |
| <b>WWF Laptop</b>                         | Guilt                 | 4.4             | 3.7                  | 5.0             | Neutral(45), Guilt (33), Anger(11), Contempt(11)                          | Shame                                                 |

|                                  |         |     |     |     |                                                                            |                                            |
|----------------------------------|---------|-----|-----|-----|----------------------------------------------------------------------------|--------------------------------------------|
| <b>Don't Almost Give – Jack</b>  | Guilt   | 4.2 | 3.4 | 5.2 | Sadness(67), Neutral(22), Contempt (11)                                    | Guilt, shame                               |
| <b>Strawberry Wasted</b>         | Guilt   | 4.1 | 4.1 | 4.4 | Neutral (37), Guilt(29), Sadness(14), Amusement (14), Anger(7)             | Amusement, contempt, guilt, sadness, shame |
| <b>60 Seconds Blood Donation</b> | Guilt   | 5.3 | 3.5 | 5.5 | Neutral (37), Guilt (25), Pride (25), Sadness (13)                         | Happiness, sadness                         |
| <b>Without...</b>                | Guilt   | 3.5 | 4   | 4.1 | Sadness (57), Guilt(22), Neutral(14), Anger(7)                             | Guilt, sad, shame                          |
| <b>Let Them Figure It Out</b>    | Guilt   | 4.9 | 3.4 | 4.7 | Guilt(23), Neutral(22), Anger(11), Happy(11), Sad(11), Fear(11), Shame(11) | Neutral, contemplative                     |
| <b>Black Friday</b>              | Guilt   | 3.8 | 4.0 | 4.2 | Neutral(44), Sadness(33), Guilt(12), Shame(11)                             | None                                       |
| <b>One Child</b>                 | Guilt   | 2.4 | 4.8 | 3.4 | Sadness(64), Guilt(22) Anger(7), Shame(7)                                  | Guilt, shame, sad                          |
| <b>Shoeboxes</b>                 | Guilt   | 2.7 | 5.1 | 3.3 | Guilt(34) Sadness(22), Anger(11) Neutral(11) Disgust(11) Fear(11)          | Sadness, guilt                             |
| <b>Playing Cards</b>             | Neutral | 5.0 | 2.6 | 5.1 | Neutral(89), Amusement(11)                                                 | Curious                                    |
| <b>Stickers</b>                  | Neutral | 5.1 | 2.8 | 5.0 | Neutral(89), Amusement(11)                                                 | None                                       |
| <b>Rubber Gloves</b>             | Neutral | 5.1 | 2.3 | 4.6 | Neutral (100)                                                              | Curious                                    |
| <b>Fibre Optics</b>              | Neutral | 5.6 | 2.8 | 5.1 | Neutral(89), Happiness(11)                                                 | Curious                                    |
| <b>Erasers</b>                   | Neutral | 5.3 | 2.5 | 5.1 | Neutral(75), Happy (12) Amused (12)                                        | Curious                                    |
| <b>Cotton</b>                    | Neutral | 5.2 | 3.0 | 5.1 | Neutral(78), Amusement(22)                                                 | None                                       |
| <b>I am Canadian</b>             | Pride   | 6.9 | 5.5 | 6.5 | Pride(50), Amusement(29), Neutral(14), Happy(7)                            | Amusement, annoyance, happy                |
| <b>The Anthem</b>                | Pride   | 7.2 | 6.0 | 6.6 | Pride(72), Happy(21), Neutral(7)                                           | Contempt, connection, happy                |
| <b>Made From Canada</b>          | Pride   | 6.5 | 5.1 | 5.6 | Pride(57), Neutral(22), Happy(14), Amusement(7)                            | Happiness                                  |

|                                    |         |     |     |     |                                                             |                                                          |
|------------------------------------|---------|-----|-----|-----|-------------------------------------------------------------|----------------------------------------------------------|
| <b>Greatest Human Achievements</b> | Pride   | 6.2 | 3.1 | 5.4 | Neutral(43), Pride(43), Fear(7), Happy (7)                  | Pride, tranquility, curiosity                            |
| <b>Peacekeeping</b>                | Pride   | 5.6 | 3.1 | 5.1 | Neutral(38), Happy(25), Pride(25), Amusement(12)            | None                                                     |
| <b>Fly the Flag</b>                | Pride   | 6.1 | 4.1 | 5.6 | Neutral(45) Happy(22) Contempt(11) Amusement(11), Pride(11) | Happiness                                                |
| <b>Last Minutes with Oden</b>      | Sadness | 2.2 | 5.8 | 3.9 | Sadness (100)                                               | Tearfulness                                              |
| <b>Notification</b>                | Sadness | 3.0 | 4.3 | 3.3 | Sadness (100)                                               | Amusement                                                |
| <b>Madly in love</b>               | Sadness | 3.8 | 4.7 | 3.9 | Sadness (100)                                               | Fear, happiness                                          |
| <b>Dying Wife</b>                  | Sadness | 4.6 | 6.1 | 4.1 | Sadness(88), Fear(12)                                       | Fear, love, happiness                                    |
| <b>SickKids vs Cancer</b>          | Sadness | 2.2 | 3.9 | 4.1 | Sadness(86), Neutral(7), Pride(7)                           | Sadness, despair, hopefulness, urgency, happiness, pride |
| <b>12 Days of Christmas</b>        | Sadness | 2.6 | 5.8 | 4.4 | Sadness(76), Neutral(12) Shame(12)                          | Sadness, fear                                            |

**Supplemental Table 3.** Video clips

| <b>Video</b>                    | <b>Emotion</b> | <b>Link to video</b>                                                    |
|---------------------------------|----------------|-------------------------------------------------------------------------|
| 60 Seconds Blood Donation§      | Guilt          | <a href="https://youtu.be/Y2A1xfWztBk">https://youtu.be/Y2A1xfWztBk</a> |
| Africare – Shoeboxes*~          | Guilt          | <a href="https://youtu.be/3DYodeY8VPU">https://youtu.be/3DYodeY8VPU</a> |
| Black Friday=                   | Guilt          | <a href="https://youtu.be/a9MRVesxS0U">https://youtu.be/a9MRVesxS0U</a> |
| WWF Laptop†                     | Guilt          | <a href="https://youtu.be/R6QUkB-CGqE">https://youtu.be/R6QUkB-CGqE</a> |
| WWF T-Shirt†                    | Guilt          | <a href="https://youtu.be/yvR3KbEI_Ck">https://youtu.be/yvR3KbEI_Ck</a> |
| Don't Almost Give-Jack+=        | Guilt          | <a href="https://youtu.be/9ONRp5sXYus">https://youtu.be/9ONRp5sXYus</a> |
| Let Them Figure It Out†         | Guilt          | <a href="https://youtu.be/OKGZseeD2aY">https://youtu.be/OKGZseeD2aY</a> |
| One Child*§=                    | Guilt          | <a href="https://youtu.be/L-QJKW3INZA">https://youtu.be/L-QJKW3INZA</a> |
| Strawberry Wasted               | Guilt          | <a href="https://youtu.be/Hj7m5ZSv8Mo">https://youtu.be/Hj7m5ZSv8Mo</a> |
| Without... =                    | Guilt          | <a href="https://youtu.be/W_0kiULLt_I">https://youtu.be/W_0kiULLt_I</a> |
| Go First                        | Amusement      | <a href="https://youtu.be/bZjGSZ8qBbc">https://youtu.be/bZjGSZ8qBbc</a> |
| Dad Makes Cookies               | Amusement      | <a href="https://youtu.be/SRaWdYA8tZk">https://youtu.be/SRaWdYA8tZk</a> |
| Charlie Sheen                   | Amusement      | <a href="https://youtu.be/CoViV_3j6uQ">https://youtu.be/CoViV_3j6uQ</a> |
| French                          | Amusement      | <a href="https://youtu.be/xW0Ake3QDgY">https://youtu.be/xW0Ake3QDgY</a> |
| Haircut                         | Amusement      | <a href="https://youtu.be/6CenKSgHxms">https://youtu.be/6CenKSgHxms</a> |
| Sinking                         | Amusement      | <a href="https://youtu.be/80kM27CNqaA">https://youtu.be/80kM27CNqaA</a> |
| Drinking 6000 Blended Maggots°• | Disgust        | <a href="https://youtu.be/YoySj8QTV88">https://youtu.be/YoySj8QTV88</a> |
| Custard‡                        | Disgust        | <a href="https://youtu.be/mgrKM-1K9s0">https://youtu.be/mgrKM-1K9s0</a> |
| The Poop Lady‡                  | Disgust        | <a href="https://youtu.be/2DAIMvPODml">https://youtu.be/2DAIMvPODml</a> |
| Rotting Chicken                 | Disgust        | <a href="https://youtu.be/DtleFGNN6vc">https://youtu.be/DtleFGNN6vc</a> |
| Rotting Meat                    | Disgust        | <a href="https://youtu.be/3cdeD8jTBzl">https://youtu.be/3cdeD8jTBzl</a> |
| Toxic Food Environment•         | Disgust        | <a href="https://youtu.be/V4eszz_Q9cA">https://youtu.be/V4eszz_Q9cA</a> |
| Cotton                          | Neutral        | <a href="https://youtu.be/A5u_RiiWjSs">https://youtu.be/A5u_RiiWjSs</a> |
| Erasers                         | Neutral        | <a href="https://youtu.be/HGmd2UFbc0w">https://youtu.be/HGmd2UFbc0w</a> |
| Fibre Optics                    | Neutral        | <a href="https://youtu.be/5OJOT37eEA4">https://youtu.be/5OJOT37eEA4</a> |
| Playing Cards                   | Neutral        | <a href="https://youtu.be/sz0SmZCJty0">https://youtu.be/sz0SmZCJty0</a> |
| Rubber Gloves                   | Neutral        | <a href="https://youtu.be/5SpTxT8fm6l">https://youtu.be/5SpTxT8fm6l</a> |
| Stickers                        | Neutral        | <a href="https://youtu.be/Xha6OwdU_L8">https://youtu.be/Xha6OwdU_L8</a> |
| Fly the Flag                    | Pride          | <a href="https://youtu.be/pB6HFRq2Ljo">https://youtu.be/pB6HFRq2Ljo</a> |
| Greatest Human Achievements     | Pride          | <a href="https://youtu.be/zG4hd5SFfSM">https://youtu.be/zG4hd5SFfSM</a> |
| I Am Canadian                   | Pride          | <a href="https://youtu.be/7g6P4GbXivQ">https://youtu.be/7g6P4GbXivQ</a> |
| Made From Canada                | Pride          | <a href="https://youtu.be/nCh4BV9uwik">https://youtu.be/nCh4BV9uwik</a> |
| Peacekeeping~                   | Pride          | <a href="https://youtu.be/dKJ5Hv-CIRY">https://youtu.be/dKJ5Hv-CIRY</a> |
| The Anthem                      | Pride          | <a href="https://youtu.be/PEQu4OHDYAQ">https://youtu.be/PEQu4OHDYAQ</a> |
| 12 Days of Christmas+§          | Sadness        | <a href="https://youtu.be/XRCKtX1rDuQ">https://youtu.be/XRCKtX1rDuQ</a> |
| Dying Wife+§                    | Sadness        | <a href="https://youtu.be/UDdD5UoIMxg">https://youtu.be/UDdD5UoIMxg</a> |
| Madly in love§                  | Sadness        | <a href="https://youtu.be/sHPUiKEBL-0">https://youtu.be/sHPUiKEBL-0</a> |
| Last Minutes with Oden°         | Sadness        | <a href="https://youtu.be/UDdD5UoIMxg">https://youtu.be/UDdD5UoIMxg</a> |

|                      |         |                                                                         |
|----------------------|---------|-------------------------------------------------------------------------|
| Notification+~       | Sadness | <a href="https://youtu.be/BgesIZPfd9M">https://youtu.be/BgesIZPfd9M</a> |
| SickKids vs Cancer§* | Sadness | <a href="https://youtu.be/sHPUikEBL-0">https://youtu.be/sHPUikEBL-0</a> |

**Content warnings:**

§Serious illness, injury, hospital

\* Child death

~War

=Poverty/homelessness

†Climate change

+Death

•Vomiting

°Animal death

‡Consumption of body waste

**Supplemental Table 4. Feedback Statements**

| Video                         | Statement                                                                 |
|-------------------------------|---------------------------------------------------------------------------|
| Black Friday                  | You like to have new things                                               |
| One Child                     | You donate less than the average Canadian to international relief efforts |
| Don't Almost Give- Jack       | You could do more to help people in Canada                                |
| Africare-Shoeboxes            | You don't want to be repeatedly asked to donate money                     |
| Without...                    | You sometimes ignore charity appeals                                      |
| Strawberry Wasted             | You waste much more food than average                                     |
| WWF Laptop                    | You waste more energy than average                                        |
| WWF T-Shirt                   | Your laundry habits waste more water than two thirds of respondents       |
| 60 Seconds Blood Donation     | You think blood and organ donation is as important as most Canadians      |
| French                        | You find humorous ads more memorable than the average Canadian            |
| Sinking                       | You can always learn a new language                                       |
| Charlie Sheen                 | You are as influenced by celebrity endorsement as most Canadians          |
| Dad Makes Cookies             | You bake less than the average Canadian                                   |
| Go First                      | You are as influenced by ads as most people                               |
| Haircut                       | Your opinion of adoption is shared by half of Canadians                   |
| Rotting Chicken               | You worry about rotted food as much as the average person                 |
| Drinking 6000 Blended Maggots | You feel as sick about maggots as the average person                      |
| Rotting Meat                  | You would never eat rotted meat                                           |
| The Poop Lady                 | You should not eat contaminated food                                      |
| Toxic Food Environment        | You are as anxious about vomiting as the average person                   |
| Custard                       | You would not eat food contaminated with bodily fluids                    |

|                             |                                                                      |
|-----------------------------|----------------------------------------------------------------------|
| Cotton                      | You will see a video about cotton thread                             |
| Rubber Gloves               | You will see a video about rubber gloves                             |
| Fibre Optics                | You will see a video about fibre optics                              |
| Erasers                     | You will see a video about erasers                                   |
| Playing Cards               | You will see a video about playing cards                             |
| Stickers                    | You will see a video about stickets                                  |
| I Am Canadian               | You are in Canada                                                    |
| Made From Canada            | Your sense of Canadian identity is as strong as average              |
| Anthem                      | Your sense of connection to the world is stronger than average       |
| Peacekeeping                | You think peacekeeping is as important as most Canadians             |
| Fly the Flag                | You feel connected to Canada                                         |
| Greatest Human Achievements | You are proud of humanity's achievements                             |
| Dying Wife                  | You get sad about as easily as other people                          |
| SickKids vs Cancer          | You think fighting cancer is important                               |
| Last Minutes with Oden      | You feel sorry for people who have recently lost a pet               |
| 12 Days of Christmas        | You should not drive unsafely                                        |
| Notification                | You feel sorry for people who have recently lost a child             |
| Madly in love               | You feel sad when someone else is sad about as often as other people |

**Supplemental Table 5.** Means, standard deviations, and ranges for trait and state characteristics. 77 participants (36 women, 41 men) completed the Guilt Inventory and EQ; 55 participants (18 women, 37 men) completed the STAI.

|                               | <b>M</b> | <b>SD</b> | <b>Range</b> |
|-------------------------------|----------|-----------|--------------|
| Guilt Inventory               | 129.104  | 22.664    | 75-190       |
| Empathy Quotient              | 44.740   | 10.462    | 21-73        |
| State-Trait Anxiety Inventory |          |           |              |
| <i>State</i>                  | 28.815   | 7.8333    | 20-55        |
| <i>Trait</i>                  | 30.259   | 11.818    | 20-74        |

**Supplemental Table 6.** Total counts of primary emotions endorsed by target emotion

| Target Emotion          | Amusement  | Disgust    | Guilt      | Neutral    | Pride      | Sadness    |
|-------------------------|------------|------------|------------|------------|------------|------------|
| <b>Endorsed Emotion</b> |            |            |            |            |            |            |
| Amusement               | <b>372</b> | 46         | 12         | 87         | 56         | 2          |
| Anger                   | 2          | 2          | 45         | 1          | 3          | 11         |
| Contempt                | 6          | 5          | 25         | 6          | 6          | 4          |
| Disgust                 | 1          | <b>445</b> | 17         | 1          | 0          | 1          |
| Embarrassment           | 3          | 7          | 45         | 0          | 2          | 0          |
| Fear                    | 3          | 4          | 27         | 1          | 1          | 7          |
| Guilt                   | 2          | 1          | <b>222</b> | 0          | 1          | 9          |
| Happiness               | 65         | 1          | 14         | 27         | 87         | 26         |
| Neutral                 | 103        | 44         | 147        | <b>435</b> | 92         | 30         |
| Pride                   | 5          | 0          | 22         | 6          | <b>314</b> | 2          |
| Sadness                 | 2          | 8          | 266        | 0          | 2          | <b>470</b> |
| Shame                   | 0          | 1          | 80         | 0          | 0          | 2          |

**Supplemental Table 7.** Total numbers of primary emotions endorsed and congruence with the video's target emotion, with total emotions broken down by valence and social nature

|                                    | Amusement | Disgust | Guilt   | Neutral | Pride   | Sadness |
|------------------------------------|-----------|---------|---------|---------|---------|---------|
| Total Emotion Endorsements         | 564       | 564     | 922     | 564     | 564     | 564     |
| Total Non-target Emotions Endorsed | 192       | 119     | 700     | 129     | 250     | 94      |
| Average Target Accuracy            | 65.957%   | 78.901% | 24.078% | 77.128% | 55.674% | 83.333% |
| Total Positive Emotions            | 442       | 47      | 48      | 120     | 401     | 30      |
| Total Negative Emotions            | 19        | 473     | 727     | 9       | 15      | 504     |
| Total Negative Social Emotions     | 5         | 9       | 347     | 0       | 3       | 11      |
| Total Positive Social Emotions     | 5         | 0       | 22      | 6       | 314     | 2       |

**Supplemental Table 8.** Counts of secondary emotions endorsed by target emotion

| Target Emotion          | Amusement  | Disgust    | Guilt      | Neutral    | Pride      | Sadness    |
|-------------------------|------------|------------|------------|------------|------------|------------|
| <b>Endorsed Emotion</b> |            |            |            |            |            |            |
| Amusement               | <b>127</b> | 67         | 35         | 84         | 112        | 13         |
| Anger                   | 9          | 66         | 125        | 3          | 2          | 69         |
| Contempt                | 11         | 73         | 65         | 12         | 22         | 18         |
| Disgust                 | 3          | <b>149</b> | 56         | 3          | 1          | 11         |
| Embarrassment           | 19         | 41         | 128        | 1          | 7          | 13         |
| Fear                    | 12         | 62         | 70         | 3          | 7          | 90         |
| Guilt                   | 12         | 13         | <b>306</b> | 5          | 3          | 59         |
| Happiness               | 177        | 8          | 36         | 43         | 301        | 77         |
| Neutral                 | 132        | 54         | 97         | <b>182</b> | 70         | 57         |
| Pride                   | 33         | 0          | 25         | 16         | <b>185</b> | 25         |
| Sad                     | 13         | 45         | 229        | 3          | 13         | <b>135</b> |
| Shame                   | 8          | 28         | 281        | 1          | 2          | 29         |

**Supplemental Table 9.** Total numbers of secondary emotions endorsed, with total emotions broken down by valence and social nature

|                                   | Amusement | Disgust | Guilt | Neutral | Pride | Sadness |
|-----------------------------------|-----------|---------|-------|---------|-------|---------|
| Total Secondary Emotions Endorsed | 556       | 606     | 1453  | 356     | 725   | 596     |
| Total Non-target Emotions         | 429       | 457     | 1147  | 174     | 540   | 461     |
| Total Positive Emotions           | 337       | 75      | 96    | 143     | 598   | 115     |
| Total Negative Emotions           | 87        | 477     | 1260  | 31      | 57    | 424     |
| Total Negative Social Emotions    | 39        | 82      | 715   | 7       | 12    | 101     |
| Total Positive Social Emotions    | 33        | 0       | 25    | 16      | 185   | 25      |



**Supplemental Table 10.** Results of paired Wilcoxon tests for AU 4-Brow Lowerer comparing amusement (M=16.91), disgust (M=26.98), neutral (M=19.51), pride (M=14.12), and sadness (M=19.90). \*p≤0.05, \*\*p≤0.01, \*\*\*p≤0.001

|         | <b>Amusement</b> | <b>Disgust</b> | <b>Neutral</b> | <b>Pride</b> |
|---------|------------------|----------------|----------------|--------------|
| Disgust | 735***           |                |                |              |
| Neutral | 1083             | 1942**         |                |              |
| Pride   | 1670*            | 2211***        | 1925***        |              |
| Sadness | 1068             | 1900**         | 1392           | 703***       |

**Supplemental Table 11.** Results of paired Wilcoxon tests for AU 12-Lip corner puller comparing amusement (M=19.18), disgust (M=16.45), neutral (M=5.65), pride (M=6.98), and sadness (M=8.68) \*p≤0.05, \*\*p≤0.01, \*\*\*p≤0.001

|         | <b>Amusement</b> | <b>Disgust</b> | <b>Neutral</b> | <b>Pride</b> |
|---------|------------------|----------------|----------------|--------------|
| Disgust | 1807.5*          |                |                |              |
| Neutral | 2484***          | 2114.5***      |                |              |
| Pride   | 2300***          | 2087***        | 1170           |              |
| Sadness | 2299.5***        | 1889**         | 918            | 912          |

**Supplemental Table 12.** Results of paired Wilcoxon tests for head tilt down comparing amusement (M=11.60), disgust (M=21.17), neutral (M=9.29), pride (M=15.02), and sadness (M=11.23) \*p≤0.05, \*\*p≤0.01, \*\*\*p≤0.001

|         | <b>Amusement</b> | <b>Disgust</b> | <b>Neutral</b> | <b>Pride</b> |
|---------|------------------|----------------|----------------|--------------|
| Disgust | 503.5***         |                |                |              |
| Neutral | 1191             | 1612.5***      |                |              |
| Pride   | 803              | 1116*          | 752            |              |
| Sadness | 1062             | 1598***        | 683            | 935          |

**Supplemental Table 13.** Results of paired Wilcoxon tests for head turn comparing amusement (M=7.67), disgust (M=19.05), neutral (M=6.82), pride (M=9.10), and sadness (M=8.54) \*p≤0.05, \*\*p≤0.01, \*\*\*p≤0.001

|         | <b>Amusement</b> | <b>Disgust</b> | <b>Neutral</b> | <b>Pride</b> |
|---------|------------------|----------------|----------------|--------------|
| Disgust | 347.5***         |                |                |              |
| Neutral | 757.5            | 1597 ***       |                |              |
| Pride   | 609.5            | 1209 ***       | 512.5          |              |
| Sadness | 709              | 1584.5***      | 557            | 591          |

**Supplemental Table 14.** Results of paired Wilcoxon tests for face touch comparing amusement (M=7.99), disgust (M=10.04), neutral (M=7.78), pride (M=8.33), and sadness (M=6.80) \*p≤0.05, \*\*p≤0.01, \*\*\*p≤0.001

|         | <b>Amusement</b> | <b>Disgust</b> | <b>Neutral</b> | <b>Pride</b> |
|---------|------------------|----------------|----------------|--------------|
| Disgust | 456.5            |                |                |              |
| Neutral | 634.5            | 574.5          |                |              |
| Pride   | 479.5            | 539.5          | 533            |              |
| Sadness | 739              | 771            | 546            | 525.5        |
